## Title:

### Assortment of flowering time and defense alleles in natural *Arabidopsis thaliana* populations suggests co-evolution between defense and vegetative lifespan strategies

Authors: Shirin Glander<sup>1</sup>, Fei He<sup>2</sup>, Gregor Schmitz<sup>2</sup>, Anika Witten<sup>1</sup>, Arndt Telschow<sup>3</sup>, J. de Meaux<sup>2</sup>

Address:

(1) Department of Genetic Epidemiology, Institute of Human Genetics, University of Münster, Albert-Schweitzer-Campus 1, D3, Domagkstraße 3, Münster, Germany

(2) Institute of Botany, University of Cologne, Zùlpicherstr. 47b, Cologne Germany

(3) Institute for Evolution and Biodiversity, University of Münster, Hüfferstraße 1, Münster, Germany

Corresponding author: [jdemeaux@uni-koeln.de](mailto:jdemeaux@uni-koeln.de)

## ABSTRACT:

The selective impact of pathogen epidemics on host defenses can be strong but remains transient. By contrast, life-history shifts can durably and continuously modify the balance between costs and benefits of immunity, which arbitrates the evolution of host defenses. Their impact, however, has seldom been documented. Here, we show with a simple mathematical model how the optimal investment into defense is expected to increase with increasing lifespan. We further document that in natural populations of the model plant *Arabidopsis thaliana*, the expression levels of defense genes correlate positively with flowering time, which in annual species is a proxy for lifespan. Using a novel genetic strategy based on bulk-segregants, we partitioned lifespan-dependent from lifespan-independent defense genes and could demonstrate that this positive co-variation can be genetically separated. It is therefore not explained by the pleiotropic action of some major regulatory genes controlling both defense and lifespan. Moreover, we find that defense genes containing variants reported to impact fitness in natural field conditions are among the genes whose expression co-varies most strongly with flowering time. In agreement with our model, this study reveals that natural selection has likely assorted alleles promoting higher expression of defense genes with alleles that increase the duration of vegetative lifespan in *A. thaliana* and *vice versa*. This is the first study documenting the pervasive impact of life history variation on the maintenance of diversity in host immunity within species.

Keywords: Co-evolution, Defense, Flowering time, Lifespan, *Arabidopsis thaliana*, Transcriptomics, Trade-off, Pleiotropy, bulk-segregant sequencing

## INTRODUCTION

The ability of living organisms to defend against pathogens is a major determinant of survival in natural populations (Parker & Gilbert, 2004; Chisholm *et al.*, 2006; Lee & Mazmanian, 2010). Pathogens have long been suspected to impose a rapid evolutionary pace on the host defense system and the “Red Queen” Hypothesis is nowadays a keystone of evolutionary biology (Van Valen, 1973; Liow *et al.*, 2011). Evidence that pathogens drive the molecular evolution of host defense systems has been accumulating in an array of plant and animal systems (Bergelson *et al.*, 2001; de Meaux & Mitchell-Olds, 2003; Moeller & Tiffin, 2005; Ravensdale *et al.*, 2010; Laine *et*

*al.*, 2010; Maekawa *et al.*, 2011; Dybdahl *et al.*, 2014; Karasov *et al.*, 2014; Siddle & Quintana-Murci, 2014; Parker *et al.*, 2015; Metzger *et al.*, 2016).

Yet, the possible impact of changes in ecology on the evolution of defense systems should also be considered as they may durably change the exposure of hosts to pathogens. Invasive species, for example, owe much of their success to the release from pathogen and pest pressures (Mitchell & Power, 2003; Mitchell *et al.*, 2010). Similarly, shifts in life history can alter the balance between costs and benefits of host defense systems. Shifting from perennial to annual life cycles, or evolving from a winter-annual to summer-annual cycling occurs frequently across plant phylogenies (Garnier, 1992; Michaels *et al.*, 2003; Franks *et al.*, 2007; Tank & Olmstead, 2008; Matthew Ogburn & Edwards, 2015; Kiefer *et al.*, 2017). The reduction in lifespan that follows such life history changes concomitantly reduces the probability to encounter a virulent pathogen. Its consequences on the optimal investment in defense can be formally described in a simple mathematical model (Fig. 1). Considering that the total energy ( $\sigma$ ) that is available for a plant is limited by natural resources, it must be divided between defense (d) and growth (g). Evidence for costs associated with defense have been documented in both, plants and animals (Lochmiller & Deerenberg, 2000; Purrington, 2000). Some plant resistance genes (R genes) involved in the surveillance systems directed against pathogenic virulence factors were shown to incur substantial fitness costs (Tian *et al.*, 2003; but see also MacQueen *et al.*, 2016). In addition, analysis of basal defense responses triggered by Pathogen Associated Molecular Pattern (PAMPs), which are broadly conserved across pathogen taxa, revealed a negative correlation between PAMP detection and growth (Vetter *et al.*, 2012). Plants thus generally face a trade-off between size at reproduction and the investment into defense. We modeled lifetime fitness (W) as the product of final size (s) by survival rate (r). Assuming that an optimal lifespan can evolve in any given environment, the investment into defense (d) and the lifespan (L) can be linked by equation (1),

$$d = 1 - \frac{1}{2L * \tau * v} \quad (1)$$

where  $\tau$  is the probability of encountering a pathogen per unit of time and  $v$  describes the virulence of the pathogen population (see Suppl. Document for details on the model). In this model, lifespan alters the so-called “effectiveness of defense”, which was an important modulator of allocation into defense in previous model that were not focused on lifespan but on all organismal characters that may alter the probability of encountering disease (Jokela *et al.*, 2000). Our model now formulates the simple prediction that the allocation into defense will be attenuated where reduced lifespan evolves and incremented where extended lifespan evolves. Positive co-variation between defense and lifespan is therefore expected.

Variation in flowering time in *A. thaliana* offers an opportunity to test the impact of adaptive life history changes on defense. *Arabidopsis thaliana*, the flagship species of plant molecular genetics, has become over the last decade a powerful model system to address ecological questions at the genetic level (Mitchell-Olds & Schmitt, 2006; Bergelson & Roux, 2010; Roux & Bergelson, 2016). Experiments in common gardens have been performed to describe the architecture of natural variation in fitness and to infer geographic distributions of locally adaptive mutations (Fournier-Level *et al.*, 2011; Hancock *et al.*, 2011; Fournier-Level *et al.*, 2016). Analyses of mutants and recombinant inbred lines (RIL) have allowed reconstructing the contribution of phenotypes to fitness (Wilczek *et al.*, 2009; Chiang *et al.*, 2013; Fournier-Level *et al.*, 2013). Secondary chemical compounds were shown to have evolved to deter predominant herbivores in natural populations (Brachi *et al.*, 2013; Kerwin *et al.*, 2015). Clinal variation along the latitudinal range of the species

reveals how phenotypes expressed along the life cycle are jointly shaped by natural selection (Lasky, 2012; Debieu *et al.*, 2013a; Vidigal *et al.*, 2016).

*A. thaliana* is also an optimal model system for questioning the impact of life history changes, which modify plant vegetative lifespan, on the evolution of the defense system. It is arguably one of the species with the greatest amount of genetic and phenotypic information on both, defense reactions against pathogens and variation in the duration of the vegetative lifespan. Indeed, in annual (monocarpic) species, which grow and reproduce only once, flowering time marks the end of the vegetative growth phase. Seed production in monocarpic species is terminated by senescence and death, so that flowering time provides a good proxy for lifespan. In *A. thaliana*, it has been scored in a number of conditions (Brachi *et al.*, 2010; Sasaki *et al.*, 2015; Roux & Bergelson, 2016) and there are convergent indications that flowering time changes are locally adaptive (Corre, 2005; Toomajian *et al.*, 2006; Montesinos-Navarro *et al.*, 2011; Debieu *et al.*, 2013b; Li *et al.*, 2014; Lasky *et al.*, 2016; Hu *et al.*, 2017). Natural variation in flowering time can thus be used to investigate the impact of lifespan changes on host defenses.

The defense system has also been intensively studied in this species, revealing multiple layers of defenses, ranging from basal defense, which is sufficient to control most microbes, to severe reactions that actively defeat virulent pathogens (Jones & Dangl, 2006). Strain-specific defense components are likely to be linked in their evolution to the virulence specificity of co-occurring pathogens (de Meaux & Mitchell-Olds, 2003; Moeller & Tiffin, 2005; Roux & Bergelson, 2016). Recent fluctuations in the composition of the pathogen population may therefore affect the specific components of defense targeted by these epidemics and thereby mask or blur the long-term impact of lifespan modifications. To minimize this effect and to highlight the impact of lifespan variation, we took a genomics approach and examined how flowering time co-varies with expression levels of genes with an experimentally-supported function in defense. These approximately 700 genes jointly reflect a broad spectrum of traits with positive effect on defense (Eulgem, 2005), whose effectiveness is predicted by our model to increase with lifespan.

## RESULTS and DISCUSSION

### Positive co-variation between expression levels of defense genes and the timing of flowering in Swedish *A. thaliana* populations

We first focused on a set of 138 genotypes originating from Sweden because high quality data were available for both genome-wide expression profiles and flowering time estimates (Dubin *et al.*, 2015; Sasaki *et al.*, 2015). These two studies were part of a single experiment in which flowering time and gene expression were characterized at both 16°C and 10°C under long day conditions. We focused on the data collected at 16°C and computed Spearman correlation coefficients between the expression level of each gene and flowering time. Of 22,686 genes, for which expression levels could be quantified, 1,374 (6%) were significantly correlated with flowering time under a 5% false discovery rate (FDR). The two most strongly correlated genes were two well-known repressors of flowering time, FLOWERING LOCUS C and SUPPRESSOR OF OVEREXPRESSION OF CONSTANS-1 (FLC and SOC1, Spearman correlation  $\rho=0.50$  and  $-0.62$ , FDR-corrected  $p=2.87e-6$  and  $p=7e-12$ , respectively). Among genes with significant correlation with flowering time, we observed a significant excess of defense genes (8.6% of 691 genes at 5% FDR, hypergeometric test,  $p=0.002$ ). The distribution of correlation coefficients was also significantly skewed towards higher correlation coefficients for defense genes (Fig. 2A, Kolmogorov-Smirnov test,  $p<2.2e-16$ ). Interestingly, genes with a

demonstrated or annotated function in flowering time in the genome were not enriched among those genes (6.9% of 630 genes at FDR 0.05, Hypergeometric test,  $p=0.19$ ). This first analysis revealed a pronounced pattern of positive co-variation between flowering time and the expression of defense genes, most of which have a positive effect on defense when they are transcriptionally activated (Eulgem, 2005).

For the genotypes in *A. thaliana* that have a strong requirement for vernalization, differences in natural lifespan might be overestimated (Brachi *et al.*, 2010; Li *et al.*, 2014). In fact, only the 51 genotypes that advanced their flowering time at 16°C compared to 10°C, showed a correlation in their flowering across temperatures (Sasaki *et al.*, 2015). The latter sub-sample of genotypes, which does not require low temperatures to induce flowering, may therefore allow a more accurate classification of genotypes with increasing vegetative lifespan. Among the 507 out of 22,686 (2.2%) genes that displayed a significant positive correlation with flowering time at 10% FDR across this restricted sample of genotypes, 16/630 and 28/691 genes belonged to flowering time or defense gene categories, respectively. Logically, several known flowering time regulators were among the genes associated with flowering time, such as FLOWERING LOCUS C (FLC), GIGANTEA, FLOWERING PROMOTING FACTOR 1-LIKE PROTEIN 2 (FLP2) or even the genes PHYTOCHROME INTERACTING FACTOR 4 (PIF4) and PHYTOCHROME INTERACTING FACTOR 5 (PIF5), which had been associated with accelerated flowering (Andrés & Coupland, 2012; Thines *et al.*, 2014). Although flowering time genes were not significantly enriched among genes correlating positively with the timing of flowering (2.5%, hypergeometric test,  $p=0.24$ ), this was the case for defense genes (4%, 1.8-fold enrichment, hypergeometric test,  $p=0.0009$ ). Importantly, in this subsample of genotypes, defense genes tended to be more highly expressed in late flowering genotypes (excess of positive correlations, Kolmogorov-Smirnov test,  $p<2.2e-16$ , Fig. 2B). This stood in contrast with flowering time genes, which tended to be more highly expressed in early flowering genotypes (excess of negative correlations, Kolmogorov-Smirnov test,  $p=1.16e-13$ , Fig. 2B).

### **Positive co-variation of defense gene expression with flowering time is independent of population structure and is also detected in a second sample of broader geographic origin**

Because flowering time in the Swedish lines is strongly associated with the demographic history of these populations and thus with their population structure (Dubin *et al.*, 2015; Sasaki *et al.*, 2015), we also computed correlation between gene expression and flowering time with a mixed-model that included a kinship matrix for the 51 genotypes that lacked vernalization requirement (see methods; (Yu *et al.*, 2006; Stich *et al.*, 2008). This analysis revealed that, for defense genes, the distribution of Spearman correlation coefficient remained strongly skewed towards positive values, after population structure was controlled for (Kolmogorov-Smirnov test,  $p=2.2e-16$ , Suppl. Fig. 1). However, defense genes were no longer enriched among genes with a significant co-variation with flowering time (5.2% vs. 5%, hypergeometric test,  $p=0.6$ ).

Accounting for population structure also did not change the pattern of co-variation between gene expression of flowering genes and timing of flowering itself. They showed a coefficient distribution that was strongly skewed towards negative values (Kolmogorov-Smirnov test,  $p=2.2e-16$ ) and were significantly over-represented among genes with expression significantly associated with flowering time (8% vs 5% at 5% FDR, hypergeometric test,  $p=0.0005$ ).

We further investigated whether the skew towards positive co-variation between defense gene expression and flowering time is limited to the regional subset of genotypes growing in Sweden or whether it is a feature of diversity that segregates across the whole range of the species. For this, we turned to a species-wide dataset of gene expression variation collected in young seedlings (Schmitz *et al.*, 2011). For 52 of these genotypes, the duration of vegetative growth had been determined under natural conditions in the field (Brachi *et al.*, 2010). Neither flowering time nor defense genes were particularly enriched among genes with significantly correlated expression and flowering time at 5% FDR (5% for both, hypergeometric test, minimum  $p=0.24$ ). Nevertheless, we again observed a strong skew towards positive correlation between defense gene expression and flowering time (Kolmogorov Smirnov test,  $D=0.19$ ,  $p<2.2e-16$ , Fig. 2C), as well as a skew towards negative correlation for flowering time genes ( $D=0.09$ ,  $p=5.3e-5$ , Fig. 2C). Contrasting genotypes of diverse flowering time (e.g. lifespan) revealed that, in natural populations, defense genes tend to co-vary positively with this trait. The latter two analyses showed that this effect remained when population structure was controlled for and was also detectable in another gene expression dataset and with a different set of genotypes.

### **A bulk-segregant analysis demonstrate that co-variation is not due to pleiotropic effect of flowering time control**

The tendency of defense genes to show expression levels correlating positively with flowering may be due to the pleiotropic action of regulatory genes that co-regulate flowering time and defense. In plants, the impact of development and growth regulators on defense systems is being increasingly recognized (Alcázar *et al.*, 2011). There is evidence that development and life history strategies influence defense reactions against pathogens (Korves & Bergelson, 2003; Pagán *et al.*, 2009; Lozano-Duran *et al.*, 2013; Fan *et al.*, 2014; Lozano-Durán & Zipfel, 2015; Jiménez-Góngora *et al.*, 2015). In crops, decoupling flowering time and defense is sometimes problematic, in that breeding for resistance disrupts the timing of flowering and vice versa (Develey-Riviere & Galiana, 2007). For example, in tomato, the introduction of the resistance gene against the pathogen *Alternaria* of a wild relative caused earlier flowering (Pajeroska-Mukhtar *et al.*, 2009). In potato breeding, the conflict between resistance and earliness of tuber formation is of such importance that breeders select for maturity corrected resistance (Collins *et al.*, 1999; Rodriguez-Falcon *et al.*, 2006; Pajeroska-Mukhtar *et al.*, 2009). In addition, infections and resistance reactions themselves can induce precocious flowering, possibly via the developmental effect of defense hormones (Martinez *et al.*, 2004; Whalen, 2005). Effects of infection on flowering time depend on the degree of infection, the pathogen type and the developmental stage of the host at the time of infection (Korves & Bergelson, 2003; Pagan *et al.*, 2008). A direct molecular link between basal plant defense triggered by the PAMP flagellin and the action of growth promoting hormones has also been demonstrated (Pieterse *et al.*, 2012; Lozano-Duran *et al.*, 2013; Jiménez-Góngora *et al.*, 2015). In addition, glucosinolates production, which provides important defense compounds against herbivores has been shown to have a pleiotropic effect delaying flowering time in natural field conditions (Kerwin *et al.*, 2015). Such pleiotropic action could in fact prevent the independent evolution of the two trait, and explain the pattern of covariation we observed. We therefore designed an experiment to describe the level of pleiotropy of flowering time genes on the expression of defense genes, in order to test whether the co-variation of flowering time with the expression of defense genes in natural populations could result from a pleiotropic action of flowering time regulators. If such regulators control the pattern of covariation reported in Fig.



2, it should not be possible to separate variation in defense gene expression from variation in flowering time in a segregating recombinant inbred population. We used the two genotypes Col-0 and Bur-0, which differ in flowering time (Simon *et al.*, 2008) and were also reported to exhibit markedly distinct sensitivities to flagellin, with the later flowering genotype Bur-0 displaying stronger basal immunity (Vetter *et al.*, 2012). We analyzed the transcriptomes of these two lines at 14 and 28 days after germination (see methods) and found that the skews shown in Fig. 2 remain when the dataset was reduced to the genes that differed in expression between these two lines (Suppl. Fig. 2). This confirmed that these two genotypes could help identify defense genes that share genetic regulators with flowering time.

We designed a cost-effective approach to identify the genes whose expression variation cannot be separated from flowering time. We used 244 recombinant inbred lines (RILs) derived from a cross between the parents Bur-0 and Col-0, followed by >8 generations of selfing (Simon *et al.*, 2008). We bulked RILs by their flowering time and characterized their transcriptomes at 14 and 28 days after germinations using RNA sequencing (see methods). In RILs, the genomes of the parental genotypes are randomly shuffled by recombination. Because of this genetic property, RILs are commonly used to identify Quantitative Trait Loci (QTL), which are genomic regions underlying the genetic control of phenotypic variation. In our approach, this means that differences in gene expression between early- and late-flowering RILs reflect differences that are genetically associated with flowering time. The experimental strategy is described in Suppl. Fig. 3-4. This strategy does not allow characterizing the exact genetic architecture of gene expression variation, but it allows the identification of genes whose expression variation is controlled either by flowering-time regulators or by genes located in the genomic vicinity of these regulators. Thereafter, we named these genes FT-controlled genes.

Of a total of 20,553 genes expressed in both the parental genotypes and RIL pools, 6,097 (29%) were differentially expressed between early and late flowering RIL pools, i.e. FT-controlled. As expected, we found a strong excess of genes annotated as flowering time genes among them (223/630 – 36%, hypergeometric test,  $p=3.7e-5$ ). Defense genes were not over-represented among FT-controlled genes. More so, they were clearly under-represented among FT-controlled genes at the second time point of sampling (1.15 fold less abundant than expected by chance at day 28, hypergeometric test,  $p=0.01$ ). Yet, 19% of all defense genes were FT-controlled. These genes, however, did not explain the skew towards positive co-variation with flowering time reported in Fig. 2. Defense genes, whose expression was not controlled by flowering time, indeed tended to be more skewed towards positive correlation coefficients than FT-controlled defense genes (Kolmogorov-Smirnov test,  $p=0.01$ , Fig. 3A). By contrast, FT-controlled flowering time genes did not shift significantly (Kolmogorov-Smirnov test,  $p=0.15$ , Fig. 3A). Therefore, the excess of positive expression co-variation with flowering time observed among defense genes is not due to a common genetic control of both traits, because our experiment has allowed to easily separate the traits by recombination. Since the correlation between flowering time and defense gene expression that we observed in natural populations is neither explained by population structure nor by genetic correlation, our results suggests the action of natural selection. Alleles attenuating the expression of defense genes were assorted with alleles promoting a shortening of flowering time and *vice-versa*. Our results thus indicate that defense and the duration of the vegetative life span co-evolve within natural *A. thaliana* populations.

## Age-regulated defense genes often show positive co-variation with flowering time

Defense genes are often observed to change their activity with age and development (Barton & Boege, 2017). Because we had sampled material at day 14 and day 28 after germination, we could also separate genes whose expression changed with age (here after named age-regulated genes) from genes with similar expression levels in 14- and 28-day-old plants (see methods). Age-regulated genes were markedly more frequent among annotated defense genes than among annotated flowering time genes (243/630 – 38% vs 334/691 - 48%, for flowering time and defense genes, respectively, Chi Square test,  $p=7.2e-11$ ). In *A. thaliana*, the effectiveness of defense is indeed regulated by plant development: the onset of age-related resistance in *A. thaliana* provides a defense barrier against a broad spectrum of pathogens (Rusterucci *et al.*, 2005). In agreement with our findings, the timing of age-related resistance had been reported not to stand under the direct control of flowering time (Wilson *et al.*, 2013).

The subset of genes, whose expression variation in natural populations correlated with flowering time, were also enriched among age-regulated genes (hypergeometric test,  $p=7.2e-11$ ). Altogether, 4% (348/8565) and 6% (498/7935) of age-independent and age-regulated genes, respectively, were correlated with flowering time at 5% FDR. Defense genes contributed significantly to this excess, because the expression levels of defense genes that were age-regulated tended to show a strong skew towards positive correlation with flowering time in natural populations (Fig. 3B, Kolmogorov-Smirnov test,  $p=0.0009$ ). Our analysis thus indicates that the tendency of defense genes to co-vary positively with flowering time in natural population is i) not explained by the genetic control of flowering time and ii) increased among genes whose expression is regulated by plant age.

### **Genes activated by elicitors of basal defense also show an excess of positive correlations with flowering time**

In the above analysis, defense levels were represented by a set of 731 genes annotated for functions related to defense. To test whether the trend we report above was limited to a set of genes defined by Gene Ontology categories, we analyzed an independent set of defense-related genes: the 245 genes whose expression is activated in *Arabidopsis* seedlings upon perception of flagellin by the PAMP receptor kinase FLAGELLIN SENSING 2 (FLS2), hereafter named FlaRe genes (Navarro *et al.*, 2004). FlaRe genes coordinate cellular and developmental responses to exposure of molecular signatures of bacteria. Only 10 FlaRe genes overlapped with the defense-annotated genes used above. We observed that FlaRe genes were enriched among genes showing positive co-variation with flowering time (Fig. 2A-C, Kolmogorov-Smirnov test,  $p<2.2e-16$ ). This observation remained when controlling for population structure (Suppl. Fig. 1, Kolmogorov-Smirnov test,  $p<2.2e-16$ ) and was also seen for flowering time measured in the field in a species-wide sample of genotypes (Fig. 2C, Kolmogorov-Smirnov test,  $p<2.2e-16$ ). When partitioning genes according to whether or not they were FT-controlled or age-regulated, we observed that FT-control did not significantly change the distribution of correlation coefficients between FlaRe gene expression and flowering time across natural genotypes (Fig. 2A-B, Kolmogorov-Smirnov test,  $p=0.15$  and  $p=0.32$ , for FT-controlled and age-regulated genes, respectively). Nevertheless, FlaRe genes were significantly under-represented among FT-controlled genes, especially at the second sampling time point (1.8-fold less frequent among flowering time controlled genes, hypergeometric test,  $p=2.24e-05$ ). By contrast, they were over-represented among age-regulated genes (2.1-fold more frequent among age-regulated genes, hypergeometric test,  $p=2.6e-08$ ). Thus, the positive co-variation reported in Fig. 1A-C is unlikely

to result from the pleiotropic action of flowering time regulators on FlaRe genes. This suggests that, like for annotated defense genes, alleles attenuating the expression of FlaRe genes were assorted with early-flowering alleles in natural populations and vice versa.

### **Fitness-associated defense genes show higher correlation coefficients with flowering time**

We further asked whether genes of stronger relevance for fitness have expression levels that are more strongly assorted with variation in the timing of flowering. A reciprocal transplant experiment performed in 4 locations throughout Europe identified 866 nucleotide variants in the genome of *A. thaliana* that significantly associated with fitness differences manifested in natural conditions (Fournier-Level *et al.* 2011). Of these variants, 15 mapped to defense genes and 17 to flowering genes. Association with fitness coincided with a skew towards higher correlation coefficients for defense genes only (Fig. 4, Kolmogorov-Smirnov test,  $D=0.46$ ,  $p=0.014$  and  $p>0.05$  for defense and flowering time genes, respectively). One of the defense genes (AT3G16720), which is activated upon exposure to the fungal PAMP chitin, was FT-regulated but it did not explain this pattern (Kolmogorov-Smirnov test,  $p=0.028$  without AT3G16720). Five of the defense genes with FT-independent immune functions were age-regulated (AT1G18150, AT1G80840, AT4G01700, AT5G19510, AT5G57220) but this did not explain the pattern either (Kolmogorov-Smirnov test,  $p=0.009$  without these genes). Of the 245 FlaRe genes, 3 contained fitness-associated SNPs. These three genes were among the genes with highest correlation coefficients (AT1G19670:  $\rho=0.397$ , AT3G16720:  $\rho=0.282$ , AT4G38860:  $\rho=0.487$ ). In agreement with our model, we thus observe that defense genes that can be most relevant for fitness in natural populations of *A. thaliana* are also genes whose expression levels were most strongly assorted with alleles determining flowering time.

### **Convergent indications that the defense system in *A. thaliana* co-evolves with flowering time**

In agreement with our model predicting that the optimal defense level is a function of the duration of vegetative lifespan, we observe that, in *A. thaliana*, individuals with a longer vegetative lifespan tend to express defense genes at a higher level. Our bulk analysis of early- and late-flowering recombinant inbred lines (RILs) shows that this pattern of co-variation results from the combination of independent alleles controlling defense gene expression and flowering time in natural populations, because these alleles could be separated in the segregating recombinant offspring of an early- and a late-flowering genotype. Because co-variation is also i) robust to the demographic history of the populations and ii) particularly pronounced for defense-gene variants that associate with fitness, our analyses suggest that this allelic combination is assembled by natural selection. This pattern holds for both, a regional and a global sample of ecotypes and is confirmed by the examination of genes annotated with a function in defense and genes observed to respond to elicitation by the common bacterial elicitor flagellin.

In this study, expression levels of defense genes provided a large set of defense-related traits, which could be contrasted with the expression of all other genes in the genome, i.e. a set of quantitative traits with no *a priori* connection to defense. The approach we took thus allowed examining general defense levels and circumvented the signature that past epidemics may have



left on some components of defense against specific pathogen strains. Our findings do not contradict evidence that a tug of war characterizes the evolution of pathogen-specific components of defense (Tellier & Brown, 2007; Roux & Bergelson, 2016). Nevertheless, to our knowledge, this work is the first to highlight the role that life history changes played in the global evolution of the defense system at the species level.

Further work is now warranted to determine the number of genetic modifications that allowed the adaptive tuning of the defense system to the timing of flowering. Our data suggest that much of the positive co-variation between defense gene expression and flowering depends on plant age. This factor is of recognized importance in plant immunity (Alcázar *et al.*, 2011; Lozano-Durán & Zipfel, 2015; Carella *et al.*, 2015) and also very well documented in ecological studies (Barton & Boege, 2017). Why age-dependent regulation of defense is so widespread and variable across taxa has not yet been fully explained. Based on our findings, it is tempting to speculate that it may mediate the response to changed selective forces on defense caused by life span modifications.

### **Field studies quantifying the direct impact of flowering time on the adaptive relevance of defence are warranted**

In monocarpic plant species, flowering terminates the vegetative growth phase and thus determines the amount of resources available for seed production; but its shortening can also enhance the probability to survive until maturity (Mitchell-Olds, 1996; Metcalf & Mitchell-Olds, 2009; Ashworth *et al.*, 2016). In *A. thaliana*, the timing of flowering is greatly variable (Lempe *et al.*, 2005; Balasubramanian *et al.*, 2006) and changes in the control of flowering have probably been instrumental in the expansion of the species' climatic and geographic range (Corre, 2005; Toomajian *et al.*, 2006; Méndez-Vigo *et al.*, 2011; Brachi *et al.*, 2013; Li *et al.*, 2014). Patterns of co-variation between flowering time and vegetative growth rate or seed dormancy change across broad climatic regions, suggesting that the timing of flowering has been adaptively remodeled multiple times across the species range (Debieu *et al.*, 2013b; Burghardt *et al.*, 2015a; Vidigal *et al.*, 2016). Our study now indicates that the maintenance of diverse locally adapted flowering time alleles associates with the maintenance of diversity in defense.

Our model describes how changes in the duration of vegetative growth alter the likelihood to encounter a pathogen and thus proposes a possible eco-evolutionary mechanism that can explain the pattern we report. Two major limitations nevertheless remain. First, flowering time is only a proxy for lifespan. It varies greatly across the species range, depending on both seasonal fluctuations, and on the genetics of its timing (Korves *et al.*, 2007; Burghardt *et al.*, 2015b; Hu *et al.*, 2017). We also observed that the pattern of covariation between defense gene expression and flowering time measured in controlled laboratory conditions is magnified in plants whose flowering is not dependent on prior cold exposure (Fig. 2A-B). Although flowering time data used to compute correlations in Fig. 2C was collected in an outdoor common garden experiment where plants were naturally vernalized, it may still depart from the lifespan that each genotype usually realizes in its native environment. The extent to which flowering time scales with lifespan in native stands needs to be confirmed.

Second, our study does not rule out the possibility that flowering time could co-evolve with other factors increasing the likelihood of infection, as e.g. humidity or mean winter temperature. A better characterization of local ecological conditions is surely required to confirm that the

assortment of flowering time and defense alleles reported here reflects the joint optimization of defense and lifespan by natural selection.

Future studies will also have to examine whether a similar evolutionary trend has emerged in species that have reshaped their life history to decrease overall vegetative lifespan. Early flowering is actually often favored when the favorable season is shortened (Franks *et al.*, 2007; Kenney *et al.*, 2014). Ongoing selection for early flowering is clearly widespread at temperate latitudes (Munguía-Rosas *et al.*, 2011) and transitions from perenniality to annuality occur frequently within phylogenies (Kiefer *et al.*, 2017). Testing whether life span reduction associates with an attenuation of defense gene expression should therefore be possible in many taxa. In fact, a recent study in monkeyflowers documented a strong positive correlation between the herbivore defense levels and the length of the growth season, which also scaled with flowering time (Kooyers *et al.*, 2017).

### **The impact of life history evolution on defense systems is expected across all kingdoms**

In animals, the idea that the optimal investment in defense depends on the life history of a species was also incorporated in evolutionary models (Jokela *et al.*, 2000). For plants and animals alike, resources available to the organism are limited. Energetic demands on growth may compete with those required for mounting defense or counteracting the negative effects of parasites and pathogens (van Boven & Weissing, 2004; Lazzaro & Little, 2009; Dowling & Simmons, 2009; Seppälä, 2015). Several evolutionary models show that a prolonged lifespan is predicted to favor resource investment into immunity (Jokela *et al.*, 2000; Medzhitov & Janeway, 2000; van Boven & Weissing, 2004; Miller *et al.*, 2007). As a consequence, changes in life history can mold the evolution of defense systems in animals as well (Van Valen, 1973; Sheldon & Verhulst, 1996; Schulenburg *et al.*, 2009). This theoretical prediction is supported by analyses of sexual dimorphism in the duration of effective breeding: females with increased reproductive longevity show stronger immune-competence (Rolff, 2007; Nunn *et al.*, 2009). In frogs, fast developing species were also shown to be more susceptible to infection by trematodes (Johnson *et al.*, 2012). Yet, such studies cannot exclude that longevity and immunity are constrained in their evolution by common regulatory factors or causal inter-dependence. To the best of our knowledge, this study is the first to provide evidence that natural variation in the activity of genes that are important for defeating pathogens is assorted with alleles controlling variation in a life history trait of considerable importance for adaptation. Local adaptation for lifespan should therefore be considered as a potentially important contributor to the maintenance of genetic diversity in defense systems.

## MATERIAL AND METHODS

### Flowering and defense candidate genes

Gene Ontology (GO) categories were used to identify functionally related genes whose annotation was inferred from experiments, direct assays, physical interaction, mutant phenotype, genetic interactions or from expression patterns. Based on the keyword “flowering” in the TAIR database, 659 flowering time genes were selected. For defense genes, we united 17 GO categories yielding 731 genes (Suppl. Table S1). For flagellin responsive (FlaRe) genes, we took the set of 245 genes that were activated in seedlings described in (Navarro *et al.*, 2004) (Suppl. Table S1). Subsets of flowering, defense and FlaRe genes containing fitness-associated single nucleotide polymorphisms (SNPs) were retrieved from Fournier-Level *et al.* 2011.

### Correlation between gene expression and flowering time in a natural population

We analyzed two published sets of natural ecotypes for which both genome-wide expression profiles and flowering time estimates were available. The first dataset comprised 138 lines from Sweden scored for both flowering time (for plants grown at 16h light-8hour dark at constant 16°C) and gene expression in whole rosette collected at the 9-true-leaf stage (Dubin *et al.*, 2015; Sasaki *et al.*, 2015). For this first dataset, gene expression and flowering were determined in the same experiment. The second dataset combined data from two sources. RNA extracted from 7-day old seedlings of 144 genotypes grown on agar plate in long days had been sequenced (Schmitz *et al.*, 2013) and expression levels quantified as quantile normalized fragment numbers per kilobases and million reads (FPKM). For 52 of these genotypes, flowering time, measured in cumulative photothermal units, had been scored in the field (Brachi *et al.*, 2010). Photo-thermal units sum up the combination of temperature and day length and thus provide an estimate of the duration of the favorable season.

Expression counts were  $\log_2 + 1$ -transformed to include null values of expression and a Spearman correlation coefficient between flowering time and expression level was computed for each gene. P-values were adjusted for false discovery rate using the `p.adjust` function in R (Benjamini & Hochberg, 1995; Yekutieli & Benjamini, 1999). A Kolmogorov-Smirnov test was used to compare the distribution of Spearman correlation coefficients  $\rho$  of flowering time and defense genes with the distribution of  $\rho$  for 22,686 genes for which gene expression was quantified. Gene enrichments were tested for using hypergeometric tests in R. To test the impact of population structure on the correlation, we ran a mixed model using the R package *lmekin* and the kinship matrix was generated with a matrix of SNPs segregating among Swedish genotypes (Dubin *et al.*, 2015).

### Correlation between gene expression and flowering time in bulk segregant pools

Seeds of Bur-0, Col-0 and 278 Bur-0xCol-0 Recombinant Inbred Lines (RIL) obtained after 8 generations of selfing were provided by the Arabidopsis Stock Center at INRA Versailles (France, (Simon *et al.*, 2008). Each line was grown individually in six replicates, each in 6cm diameter pots randomly allocated to 24 trays, each containing 35 pots. Seeds were stratified at 5°C for 3 days and grown in growth chambers (Elbanton BV, Holland, equipped with Sylvania Gro-Lux F36W /Gro (T8) fluorescent tubes and Osram 25 W 220 Lumen light bulbs) under

long-day conditions (21°C, 16h light, 18°C, 8h dark). Trays were rotated within the chamber every other day. Flowering time was scored as the day to the first open flower. Genotypes of individuals lines were retrieved from Simon *et al.* (2008) and mapping of flowering time recovered the same QTL (not shown).

We selected the 40 RIL in the 15% and 85% quantiles of flowering time for RNA sequencing. Each RIL and the two parental lines were planted in 20 replicates in the conditions described above. At days 14 and 28, the oldest true leaf was flash-frozen in liquid nitrogen. Three pools, each combining 13 RIL, were produced at each time point for early and late lines, for a total of 3 biological replicates, 2 pool types (early and late RIL) and 2 time points (14 and 28 days). For each of the two parental lines, leaves of 12 replicates were pooled for each time point.

RNA was isolated using the TRIzol extraction protocol (ThermoFisher Scientific, USA). DNA traces were removed with the Ambion DNA-free kit (ThermoFisher Scientific, USA) and purified RNA was stored in TE buffer at -80°C. RNA quality and integrity was confirmed with the 2100 Expert Software on a Bioanalyzer (Agilent Technologies, Inc. Waldbronn, Germany). Only samples with RNA integrity index (RIN) of at least 8 were sequenced. Single-read libraries were prepared with 1µg of total RNA per sample using the Illumina TruSeq RNA Sample Preparation Kit v2 (Illumina Inc. San Diego, USA) based on poly-A RNA purification. Sequencing of 75bp single reads was performed on the Illumina HighScan SQ system of the Core Facility of the Department of Genetic Epidemiology, Institute of Human Genetics, University of Münster, Germany. Raw data has been deposited in NCBI's Gene Expression Omnibus (Edgar *et al.*, 2002) and are accessible through GEO Series accession number GSE97664.

### Data analysis of RNA-seq from bulk segregant pools

Raw sequences were demultiplexed and read quality validated with FastQC. Bad quality base calls were trimmed using the fastx-toolkit (Version 0.013, Li *et al.* 2009). Trimmed reads (FastQ, quality score 33, quality threshold 20 and minimum length 30 base pair) were mapped to the *A. thaliana* TAIR10 annotated transcriptome using Bowtie 2 (version 2-2.0.0-beta6, (Langmead & Salzberg, 2012). Tophat (version-2.0.5.Linux\_x86\_64) was used to discover splice sites and Cufflinks for assembling the transcriptome (Trapnell *et al.*, 2010). We used a custom R script to verify that coverage was uniform across transcripts and confirmed that the RNA sequenced was not degraded. Read counts were calculated by counting the number of reads that mapped uniquely to the corresponding gene (isoforms were not considered). Lowly expressed genes with less than 20 reads over all samples were excluded from the analysis. The samples clustered by time point of sampling (Suppl. Figure 4), with the exception of RNA samples from the Col-0 at 28 days, which resembled more expression levels measured at 14 days, probably because of its early shift to flowering. Differentially expressed (DE) genes were identified by running a nested analysis of sampling time effects within parental genotype (and/or early- and late-flowering leaf pools) with DESeq2 version 1.2.5 (Anders *et al.*, 2013; Love *et al.*, 2014). P-values were corrected for false discovery rate (Benjamini-Hochberg correction; (Benjamini & Hochberg, 1995). DE genes were defined as having an adjusted p-value<0.05. This analysis allowed the identification of genes showing differential expression between the parents (Suppl. Table S2) and genes showing flowering time dependent expression (differential expression between early and late flowering RIL pools, i.e. FT-regulated genes Suppl. Table S3) both at day 14 and at day 28. We performed further analyses to disentangle significant sources of gene expression variation. To test whether gene expression was significantly modified at each time point, separate tests were performed for each parental genotype and RIL pool type. Genes differentially regulated at 14- and 28-days in

Bur-0 (adjusted  $p$ -value $<0.05$ ) were defined as age-regulated genes (Suppl. Table S4). To determine whether one or both sampling time points drove significant differential expression, separate tests were performed for each time point (not shown).

### Confirmation with qRT PCR

We confirmed gene expression levels for 11 selected defense genes with differential expression between Bur-0 and Col-0 or early vs. late flowering pools ( $\log_2$ -fold change  $> 1.5$ ) using RT-PCR. We followed standard protocols and used RNA Helicase (AT1G58060), Protein Phosphatase 2A Subunit A3 (PP2AA3) and transcript AT5G12240 as control genes. Gene expression based on RNA sequencing and RT-PCR were strongly correlated (Pearson correlation,  $0.58 < R < 0.96$ , max  $p < 0.01$ ).

### Figure legends

**Figure 1:** Model of co-evolution between defense and the timing of flowering ( $f_t$ ) which marks the end of the vegetative lifespan in annual plants.  $f_t$  influences survival via its impact on the risk of infection, as well as plant size, which is a function of the length of vegetative lifespan. Optimal defense thus maximizes survival as a function of  $f_t$ . Size at flowering determines the amount of resources available for seed production and thus fitness ( $W$ ). Parameters of the model are listed in the inset.

**Figure 2:** Distribution of Spearman correlation coefficients between expression levels of each expressed *A. thaliana* gene and flowering time. Grey: All expressed genes; Blue: Genes annotated as flowering time genes (FT genes); Red: Genes annotated as defense genes; Pink: Flagellin-responsive (FlaRe) genes (Navarro *et al.* 2004). **A.** For 138 Swedish genotypes; **B.** Analysis restricted to 51 Swedish genotypes showing correlated flowering time at 10°C and 16°C; **C.** Species-wide sample of 52 genotypes. Distribution for each group of genes was compared to the genome-wide distribution (black double-head arrow) with a Kolmogorov-Smirnov test. P-values are given in the color corresponding to the gene class. Spearman correlation coefficients were computed between expression levels of each of 23,511 expressed *A. thaliana* genes, reported in Durbin *et al.* 2015 for 9th leaf seedlings, and flowering time measured in the same condition for 51 genotypes originating from natural populations in Sweden (Sasaki *et al.* 2015). \*\*\*  $p < 0.001$ .

**Figure 3:** Distribution of Spearman correlation coefficients between gene expression level and flowering time. **A.** Partition of genes controlled by flowering time (blue border) vs independent from flowering time (black border); **B.** Partition of genes controlled by development (orange border) vs independent from development (black border). Defense genes that are not controlled by flowering time but controlled by development tend to have higher correlation coefficients of natural variation for expression with natural variation for flowering time. Grey: All expressed genes; Blue: Genes annotated as flowering time genes (FT genes); Red: Genes annotated as defense genes; Pink: Flagellin-responsive (FlaRe) genes (Navarro *et al.* 2004). P-values for Kolmogorov-Smirnov test comparing the distribution of genes within each category that are independent of or regulated by **A.** flowering time or **B.** age are shown when significant. Note that only 12 FlaRe genes are controlled by flowering time in our experiment. Spearman correlation



coefficients were computed between expression levels of each of 23,511 expressed *A. thaliana* genes, reported in Durbin *et al.* 2015 for 9th leaf seedlings, and flowering time measured in the same condition for 51 genotypes originating from natural populations in Sweden (Sasaki *et al.* 2015). \*  $p < 0.05$ , \*\*\*  $p < 0.001$ .

**Figure 4:** Distribution of Spearman correlation coefficients between gene expression level and flowering time. All expressed genes -black border- vs. genes with fitness-associated SNPs in Fournier-Level *et al.* (2011), - purple border-. Grey: All expressed genes; Blue: Genes annotated as flowering time genes (FT genes); Red: Genes annotated as defense genes. Defense genes that carry SNPs associating with fitness tend to have higher correlation coefficients of natural variation for expression with natural variation for flowering time. P-values for Kolmogorov-Smirnov test comparing the distribution for genes within each category are shown when significant. Spearman correlation coefficients were computed between expression levels of each of 23,511 expressed *A. thaliana* genes, reported in Durbin *et al.* 2015 for 9th leaf seedlings, and flowering time measured in the same condition for 51 genotypes originating from natural populations in Sweden (Sasaki *et al.* 2015). \*  $p < 0.05$ .

## Supplementary Tables

**Suppl. Table 1:** List of defense genes and GO categories (only gene annotations based on experimental validation were considered). FlaRe genes and flowering time genes used in the study.

**Suppl. Table 2:** FT-regulated genes (DE between early and late flowering RIL pools). Output of gene expression analysis includes mean read count (FPKM), log<sub>2</sub> fold-change, Standard error of the log<sub>2</sub> fold-change; p-value and FDR adjusted p-value. FT-regulated genes have FDR adjusted p-values <0.05.

**Suppl. Table 3:** Differentially expressed genes between Col-0 and Bur-0. Output of gene expression analysis includes mean read count (FPKM), log<sub>2</sub> fold-change, Standard error of the log<sub>2</sub> fold-change; p-value and FDR adjusted p-value. Genes differently regulated between Col-0 and Bur-0 have FDR adjusted p-values <0.05.

**Suppl. Table 4:** Age-regulated genes defined as differential gene expression changes in Bur-0 between 14- and 28-days. Output of gene expression analysis includes mean read count (FPKM), log<sub>2</sub> fold-change, Standard error of the log<sub>2</sub> fold-change; p-value and FDR adjusted p-value. FT-regulated genes have FDR adjusted p-values <0.05.

## Supplementary Document

Model of co-evolution between flowering time and defense

## Supplementary Figures

**Suppl. Figure 1:** Distribution of estimated effect of flowering time as explanatory factor of gene expression variation, taking into account population structure between Swedish genotypes of group A (Group A genotypes advance their flowering at 16°C compared to 10°C and show correlated flowering at 10°C and 16°C, Sasaki *et al.* 2015). The trend shown in Figure 1 is maintained after controlling for population structure. P-values for Kolmogorov-Smirnov test comparing estimate distribution for the gene subset compared to the genome-wide distribution are given. **A.** Density distribution, **B.** Boxplots.

**Suppl. Figure 2:** Distribution of correlation coefficients between gene expression and flowering time restricted to the genes showing differential expression in Col-0 vs. Bur-0. Expression differences between the genotypes Col-0 and Bur-0 recapitulate the pattern reported within natural populations in Figure 1. Distribution of Spearman correlation coefficients between gene expression level and flowering time for a set of genotypes showing consistent differences in flowering at 10°C and 16°C (Group A genotypes, Sasaki *et al.* 2015). This analysis is restricted to the 6980 genes showing differential expression between Col-0 and Bur-0. Defense genes have a stronger skew in correlation coefficients with flowering time. Spearman correlation coefficients were computed between expression level of each of 6980 expressed *A. thaliana* genes, reported in Durbin *et al.* 2015 for 9th leaf seedlings, and flowering time measured in the same condition. Genotypes originate from natural populations in Sweden (Sasaki *et al.* 2015). Black line: All expressed genes, Blue lines: Gene annotated as flowering time genes (FT genes), Red lines: Genes annotated as defense genes, Pink line: Flagellin-responsive (FlaRe) genes (Navarro *et al.* 2004).

**Suppl. Figure 3:** Bulk-sequencing strategy used to identify FT-controlled genes, i.e. genes whose expression is genetically controlled by flowering time regulators or by genes located closely to and therefore co-segregating with flowering time regulators.

**Suppl. Figure 4:** Heatmap of gene expression variation between samples for the 1000 genes showing highest expression variation between samples. Clustering of gene expression levels across sample and replicate shows that samples partition by age, and flowering time.

## Acknowledgements

This research was supported by the Deutsche Forschung Gesellschaft (DFG) in the realm of SPP1530, and by the European Research Council with Grant 648617 “AdaptoSCOPE”. Raw data has been deposited in NCBI's Gene Expression Omnibus (Edgar *et al.* 2002) and are accessible through GEO Series accession number GSE97664.

## References

- Alcázar R, Reymond M, Schmitz G, de Meaux J. 2011. Genetic and evolutionary perspectives on the interplay between plant immunity and development. *Current opinion in plant biology* **14**: 378–384.
- Anders S, McCarthy DJ, Chen Y, Okoniewski M, Smyth GK, Huber W, Robinson MD. 2013. Count-based differential expression analysis of RNA sequencing data using R and Bioconductor. *Nature protocols* **8**: 1765–1786.

**Andrés F, Coupland G. 2012.** The genetic basis of flowering responses to seasonal cues. *Nature Reviews Genetics* **13**: 627–639.

**Ashworth MB, Walsh MJ, Flower KC, Vila Aiub MM, Powles SB. 2016.** Directional selection for flowering time leads to adaptive evolution in *Raphanus raphanistrum* (Wild radish). *Evolutionary Applications* **9**: 619–629.

**Balasubramanian S, Sureshkumar S, Agrawal M, Michael TP, Wessinger C, Maloof JN, Clark R, Warthmann N, Chory J, Weigel D. 2006.** The PHYTOCHROME C photoreceptor gene mediates natural variation in flowering and growth responses of *Arabidopsis thaliana*. **38**: 711–715.

**Barton KE, Boege K. 2017.** Future directions in the ontogeny of plant defence: understanding the evolutionary causes and consequences (T Turlings, Ed.). *Ecology Letters* **20**: 403–411.

**Benjamini Y, Hochberg Y. 1995.** Controlling the False Discovery Rate - a Practical and Powerful Approach to Multiple Testing. *Journal of the Royal Statistical Society Series B-Methodological* **57**: 289–300.

**Bergelson J, Roux F. 2010.** Towards identifying genes underlying ecologically relevant traits in *Arabidopsis thaliana*. *Nature Reviews Genetics* **11**: 867–879.

**Bergelson J, Dwyer G, Emerson JJ. 2001.** Models and data on plant-enemy coevolution. *Annual Review of Genetics* **35**: 469–499.

**Brachi B, Faure N, Horton M, Flahauw E, Vazquez A, Nordborg M, Bergelson J, Cuguen J, Roux F. 2010.** Linkage and association mapping of *Arabidopsis thaliana* flowering time in nature. *PLoS Genetics* **6**: e1000940.

**Brachi B, Villoutreix R, Faure N, Hautekèete N, Piquot Y, Pauwels M, Roby D, Cuguen J, Bergelson J, Roux F. 2013.** Investigation of the geographical scale of adaptive phenological variation and its underlying genetics in *Arabidopsis thaliana*. *Molecular Ecology* **22**: 4222–4240.

**Burghardt LT, Metcalf C, Wilczek AM, Schmitt J. 2015a.** Modeling the Influence of Genetic and Environmental Variation on the Expression of Plant Life Cycles across Landscapes. *The American Naturalist*.

**Burghardt LT, Metcalf CJE, Wilczek AM, Schmitt J, Donohue K. 2015b.** Modeling the influence of genetic and environmental variation on the expression of plant life cycles across landscapes. *The American Naturalist* **185**: 212–227.

**Carella P, Wilson DC, Cameron RK. 2015.** Some things get better with age: differences in salicylic acid accumulation and defense signaling in young and mature *Arabidopsis*. *Frontiers in Plant Science* **5**: 1001.

**Chiang GCK, Barua D, Dittmar E, Kramer EM, de Casas RR, Donohue K. 2013.** Pleiotropy in the wild: the dormancy gene *DOG1* exerts cascading control on life cycles. *Evolution* **67**: 883–893.

**Chisholm ST, Coaker G, Day B, Staskawicz BJ. 2006.** Host-microbe interactions: shaping the evolution of the plant immune response. *Cell* **124**: 803–814.

**Collins A, Milbourne D, Ramsay L, Meyer R, Chatot-Balandras C, Oberhagemann P, De Jong W, Gebhardt C, Bonnel E, Waugh R. 1999.** QTL for field resistance to late blight in

potato are strongly correlated with maturity and vigour. *Molecular Breeding* **5**: 387–398.

**Corre VL. 2005.** Variation at two flowering time genes within and among populations of *Arabidopsis thaliana*: comparison with markers and traits. *Molecular Ecology* **14**: 4181–4192.

**de Meaux J, Mitchell-Olds T. 2003.** Evolution of plant resistance at the molecular level: ecological context of species interactions. *Heredity* **91**: 345–352.

**Debieu M, Tang C, Stich B, Sikosek T, EFFGEN S, Josephs E, Schmitt J, Nordborg M, Koornneef M, de Meaux J. 2013a.** Co-variation between seed dormancy, growth rate and flowering time changes with latitude in *Arabidopsis thaliana*. (JO Borevitz, Ed.). *PLoS ONE* **8**: e61075.

**Debieu M, Tang C, Stich B, Sikosek T, EFFGEN S, Josephs E, Schmitt J, Nordborg M, Koornneef M, de Meaux J. 2013b.** Co-Variation between Seed Dormancy, Growth Rate and Flowering Time Changes with Latitude in *Arabidopsis thaliana* (JO Borevitz, Ed.). *PLoS ONE* **8**: e61075.

**Develey-Riviere MP, Galiana E. 2007.** Resistance to pathogens and host developmental stage: a multifaceted relationship within the plant kingdom. *New Phytologist* **175**: 405–416.

**Dowling DK, Simmons LW. 2009.** Reactive oxygen species as universal constraints in life-history evolution. *Proc Biol Sci* **276**: 1737–1745.

**Dubin MJ, Zhang P, Meng D, Remigereau M-S, Osborne EJ, Paolo Casale F, Drewe P, Kahles A, Jean G, Vilhjálmsson B, et al. 2015.** DNA methylation in *Arabidopsis* has a genetic basis and shows evidence of local adaptation. *eLife* **4**: e05255.

**Dybdahl MF, Jenkins CE, Nuismer SL. 2014.** Identifying the Molecular Basis of Host-Parasite Coevolution: Merging Models and Mechanisms. *The American Naturalist* **184**: 1–13.

**Edgar R, Domrachev M, Lash AE. 2002.** Gene Expression Omnibus: NCBI gene expression and hybridization array data repository. *Nucleic Acids Research* **30**: 207–210.

**Eulgem T. 2005.** Regulation of the *Arabidopsis* defense transcriptome. *Trends in Plant Science* **10**: 71–78.

**Fan M, Bai M-Y, Kim J-G, Wang T, Oh E, Chen L, Park CH, Son S-H, Kim S-K, Mudgett MB, et al. 2014.** The bHLH Transcription Factor HBI1 Mediates the Trade-Off between Growth and Pathogen-Associated Molecular Pattern-Triggered Immunity in *Arabidopsis*. *The Plant cell* **26**: 828–841.

**Fournier-Level A, Korte A, Cooper MD, Nordborg M, Schmitt J, Wilczek AM. 2011.** A map of local adaptation in *Arabidopsis thaliana*. *Science* **334**: 86–89.

**Fournier-Level A, Perry EO, Wang JA, Braun PT, Migneault A, Cooper MD, Metcalf CJE, Schmitt J. 2016.** Predicting the evolutionary dynamics of seasonal adaptation to novel climates in *Arabidopsis thaliana*. *Proceedings of the National Academy of Sciences* **113**: E2812–21.

**Fournier-Level A, Wilczek AM, Cooper MD, Roe JL, Anderson J, Eaton D, Moyers BT, Petipas RH, Schaeffer RN, Pieper B, et al. 2013.** Paths to selection on life history loci in different natural environments across the native range of *Arabidopsis thaliana*. *Molecular Ecology* **22**: 3552–3566.

- Franks SJ, Sim S, Weis AE. 2007.** Rapid evolution of flowering time by an annual plant in response to a climate fluctuation. *Proceedings of the National Academy of Sciences of the United States of America* **104**: 1278–1282.
- Garnier E. 1992.** Growth Analysis of Congeneric Annual and Perennial Grass Species. *The Journal of Ecology* **80**: 665.
- Hancock AM, Brachi B, Faure N, Horton MW, Jarymowycz LB, Sperone FG, Toomajian C, Roux F, Bergelson J. 2011.** Adaptation to climate across the *Arabidopsis thaliana* genome. *Science* **334**: 83–86.
- Hu J, Lei L, de Meaux J. 2017.** Temporal fitness fluctuations in experimental *Arabidopsis thaliana* populations. *bioRxiv*: 118745–29.
- Jiménez-Góngora T, Kim S-K, Lozano-Durán R, Zipfel C. 2015.** Flg22-Triggered Immunity Negatively Regulates Key BR Biosynthetic Genes. *Frontiers in Plant Science* **6**: 303.
- Johnson PTJ, Rohr JR, Hoverman JT, Kellermanns E, Bowerman J, Lunde KB. 2012.** Living fast and dying of infection: host life history drives interspecific variation in infection and disease risk. *Ecology Letters* **15**: 235–242.
- Jokela J, Schmid-Hempel P, Rigby MC. 2000.** Dr. Pangloss restrained by the Red Queen - steps towards a unified defence theory. *Oikos* **89**: 267–274.
- Jones JDG, Dangl JL. 2006.** The plant immune system. *Nature* **444**: 323–329.
- Karasov TL, Kniskern JM, Gao L, DeYoung BJ, Ding J, Dubiella U, Lastra RO, Nallu S, Roux F, Innes RW, et al. 2014.** The long-term maintenance of a resistance polymorphism through diffuse interactions. *Nature* **512**: 436–440.
- Kenney AM, Mckay JK, Richards JH, JUENGER TE. 2014.** Direct and indirect selection on flowering time, water-use efficiency (WUE,  $\delta^{13}C$ ), and WUE plasticity to drought in *Arabidopsis thaliana*. *Ecology and evolution* **4**: 4505–4521.
- Kerwin R, Feusier J, Corwin J, Rubin M, Lin C, Muok A. 2015.** Natural genetic variation in *Arabidopsis thaliana* defense metabolism genes modulates field fitness. *eLife*.
- Kiefer C, Severing E, Karl R, Bergonzi S, Koch M, Tresch A, Coupland G. 2017.** Divergence of annual and perennial species in the Brassicaceae and the contribution of cis-acting variation at FLC orthologues. *Molecular Ecology* **107**: 11632.
- Kooyers NJ, Blackman BK, Holeski LM. 2017.** Optimal defense theory explains deviations from latitudinal herbivory defense hypothesis. *Ecology* **98**: 1036–1048.
- Korves TM, Bergelson J. 2003.** A developmental response to pathogen infection in *Arabidopsis*. *PLANT PHYSIOLOGY* **133**: 339–347.
- Korves TM, Schmid KJ, Caicedo AL, Mays C, Stinchcombe JR, Purugganan MD, Schmitt J. 2007.** Fitness effects associated with the major flowering time gene FRIGIDA in *Arabidopsis thaliana* in the field. *American Naturalist* **169**: E141–E157.
- Laine A-L, Burdon JJ, Dodds PN, Thrall PH. 2010.** Spatial variation in disease resistance: from molecules to metapopulations. *Journal of Ecology* **99**: 96–112.



**Langmead B, Salzberg SL. 2012.** Fast gapped-read alignment with Bowtie 2. *Nature Methods* **9**: 357–359.

**Lasky JR. 2012.** Characterizing genomic variation of *Arabidopsis thaliana*: the roles of geography and climate. *21*: 5512–5529.

**Lasky JR, Forester BR, Reimherr M. 2016.** Uncovering the genomic basis of local adaptation by coherent synthesis of associations with phenotypes and home environments. *bioRxiv*: 051110.

**Lazzaro BP, Little TJ. 2009.** Immunity in a variable world. *Philosophical Transactions of the Royal Society B: Biological Sciences* **364**: 15–26.

**Lee YK, Mazmanian SK. 2010.** Has the Microbiota Played a Critical Role in the Evolution of the Adaptive Immune System? *Science* **330**: 1768–1773.

**Lempe J, Balasubramanian S, Sureshkumar S, Singh A, Schmid M, Weigel D. 2005.** Diversity of Flowering Responses in Wild *Arabidopsis thaliana* Strains. *PLoS Genetics* **1**: e6.

**Li P, Filiault D, Box MS, Kerdaffrec E, van Oosterhout C, Wilczek AM, Schmitt J, McMullan M, Bergelson J, Nordborg M, et al. 2014.** Multiple FLC haplotypes defined by independent cis-regulatory variation underpin life history diversity in *Arabidopsis thaliana*. *Genes & Development* **28**: 1635–1640.

**Liow LH, Van Valen L, Stenseth NC. 2011.** Red Queen: from populations to taxa and communities. *Trends in Ecology & Evolution* **26**: 349–358.

**Lochmiller RL, Deerenberg C. 2000.** Trade-offs in evolutionary immunology: just what is the cost of immunity? *Oikos* **88**: 87–98.

**Love MI, Huber W, Anders S. 2014.** Moderated estimation of fold change and dispersion for RNA-seq data with DESeq2. *Genome Biology* **15**: 550.

**Lozano-Duran R, Macho AP, Boutrot F, Segonzac C, Somssich IE, Zipfel C. 2013.** The transcriptional regulator BZR1 mediates trade-off between plant innate immunity and growth. *eLife* **2**: e00983–e00983.

**Lozano-Durán R, Zipfel C. 2015.** Trade-off between growth and immunity: role of brassinosteroids. *Trends in Plant Science* **20**: 12–19.

**MacQueen A, Sun X, Bergelson J. 2016.** Genetic architecture and pleiotropy shape costs of Rps2-mediated resistance in *Arabidopsis thaliana*. *Nature Plants* **2**: 1–8.

**Maekawa T, Kufer TA, Schulze-Lefert P. 2011.** NLR functions in plant and animal immune systems: so far and yet so close. *Nature Immunology* **12**: 817–826.

**Martinez C, Pons E, Prats G, Leon J. 2004.** Salicylic acid regulates flowering time and links defence responses and reproductive development. *Plant Journal* **37**: 209–217.

**Matthew Ogburn R, Edwards EJ. 2015.** Life history lability underlies rapid climate niche evolution in the angiosperm clade Montiaceae. *Molecular Phylogenetics and Evolution* **92**: 181–192.

**Medzhitov R, Janeway C. 2000.** The Toll receptor family and microbial recognition. *Trends in Microbiology* **8**: 452–456.

**Metcalf CJE, Mitchell-Olds T. 2009.** Life history in a model system: opening the black box with *Arabidopsis thaliana*. *Ecology Letters* **12**: 593–600.

**Metzger CMJA, Luijckx P, Bento G, Mariadassou M, Ebert D. 2016.** The Red Queen lives: Epistasis between linked resistance loci. *Evolution* **70**: 480–487.

**Méndez-Vigo B, Picó FX, Ramiro M, Martínez-Zapater JM, Alonso-Blanco C. 2011.** Altitudinal and climatic adaptation is mediated by flowering traits and FRI, FLC, and PHYC genes in *Arabidopsis*. *PLANT PHYSIOLOGY* **157**: 1942–1955.

**Michaels SD, He Y, Scortecci KC, Amasino RM. 2003.** Attenuation of FLOWERING LOCUS C activity as a mechanism for the evolution of summer-annual flowering behavior in *Arabidopsis*. *Proceedings of the National Academy of Sciences of the United States of America* **100**: 10102–10107.

**Miller MR, White A, Boots M. 2007.** Host life span and the evolution of resistance characteristics. *Evolution* **61**: 2–14.

**Mitchell CE, Power AG. 2003.** Release of invasive plants from fungal and viral pathogens. *Nature* **421**: 625–627.

**Mitchell CE, Blumenthal D, Jarošík V, Puckett EE, Pyšek P. 2010.** Controls on pathogen species richness in plants' introduced and native ranges: roles of residence time, range size and host traits. *Ecology Letters* **13**: 1525–1535.

**Mitchell-Olds T. 1996.** Pleiotropy causes long-term genetic constraints on life-history evolution in *Brassica rapa*. *Evolution* **50**: 1849–1858.

**Mitchell-Olds T, Schmitt J. 2006.** Genetic mechanisms and evolutionary significance of natural variation in *Arabidopsis*. *Nature* **441**: 947–952.

**Moeller DA, Tiffin P. 2005.** Genetic diversity and the evolutionary history of plant immunity genes in two species of *Zea*. *Molecular Biology and Evolution* **22**: 2480–2490.

**Montesinos-Navarro A, Wig J, Picó FX, Tonsor SJ. 2011.** *Arabidopsis thaliana* populations show clinal variation in a climatic gradient associated with altitude. *New Phytologist* **189**: 282–294.

**Munguía-Rosas MA, Ollerton J, Parra-Tabla V, De-Nova JA. 2011.** Meta-analysis of phenotypic selection on flowering phenology suggests that early flowering plants are favoured. *Ecology Letters* **14**: 511–521.

**Navarro L, Zipfel C, Rowland O, Keller I, Robatzek S, Boller T, Jones JDG. 2004.** The transcriptional innate immune response to flg22. Interplay and overlap with Avr gene-dependent defense responses and bacterial pathogenesis. *Plant Physiology* **135**: 1113–1128.

**Nunn CL, Lindenfors P, Pursall ER, Rolf J. 2009.** On sexual dimorphism in immune function. *Philosophical Transactions of the Royal Society B: Biological Sciences* **364**: 61–69.

**Pagan I, Alonso-Blanco C, Garcia-Arenal F. 2008.** Host responses in life-history traits and tolerance to virus infection in *Arabidopsis thaliana*. *PLoS Pathogens* **4**.

**Pagán I, Alonso-Blanco C, García-Arenal F. 2009.** Differential tolerance to direct and indirect density-dependent costs of viral infection in *Arabidopsis thaliana*. *PLoS Pathogens* **5**: e1000531.

**Pajerowska-Mukhtar K, Stich B, Achenbach U, Ballvora A, Lubeck J, Strahwald J, Tacke E, Hofferbert HR, Ilarionova E, Bellin D, et al. 2009.** Single Nucleotide Polymorphisms in the Allene Oxide Synthase 2 Gene Are Associated With Field Resistance to Late Blight in Populations of Tetraploid Potato Cultivars. *Genetics* **181**: 1115–1127.

**Parker IM, Gilbert GS. 2004.** The Evolutionary Ecology of Novel Plant-Pathogen Interactions. *dx.doi.org* **35**: 675–700.

**Parker IM, Saunders M, Bontrager M, Weitz AP, Hendricks R, Magarey R, Suiter K, Gilbert GS. 2015.** Phylogenetic structure and host abundance drive disease pressure in communities. *Nature* **520**: 542–544.

**Pieterse CMJ, Van der Does D, Zamioudis C, Leon-Reyes A, Van Wees SCM. 2012.** Hormonal modulation of plant immunity. *Annual review of cell and developmental biology* **28**: 489–521.

**Purrington CB. 2000.** Costs of resistance. *Current opinion in plant biology* **3**: 305–308.

**Ravensdale M, Nemri A, Thrall PH, Ellis JG, Dodds PN. 2010.** Co-evolutionary interactions between host resistance and pathogen effector genes in flax rust disease. *Molecular Plant Pathology* **12**: 93–102.

**Rodriguez-Falcon M, Bou J, Prat S. 2006.** Seasonal control of tuberization in potato: Conserved elements with the flowering response. *Annual Review of Plant Biology* **57**: 151–180.

**Rolff J. 2007.** Why did the acquired immune system of vertebrates evolve? *Developmental and comparative immunology* **31**: 476–482.

**Roux F, Bergelson J. 2016.** The Genetics Underlying Natural Variation in the Biotic Interactions of *Arabidopsis thaliana*: The Challenges of Linking Evolutionary Genetics and Community Ecology. *Current topics in developmental biology* **119**: 111–156.

**Rusterucci C, Zhao Z, Haines K, Mellersh D, Neumann A, Cameron RK. 2005.** Age-related resistance to *Pseudomonas syringae* pv. *tomato* is associated with the transition to flowering in *Arabidopsis* and is effective against *Peronospora parasitica*. *Physiological and Molecular Plant Pathology* **66**: 222–231.

**Sasaki E, Zhang P, Atwell S, Meng D, Nordborg M. 2015.** ‘Missing’ G x E Variation Controls Flowering Time in *Arabidopsis thaliana* (G Gibson, Ed.). *PLoS Genetics* **11**: e1005597.

**Schmitz RJ, Schultz MD, Lewsey MG, O'Malley RC, Urich MA, Libiger O, Schork NJ, Ecker JR. 2011.** Transgenerational epigenetic instability is a source of novel methylation variants. *Science* **334**: 369–373.

**Schmitz RJ, Schultz MD, Urich MA, Nery JR, Pelizzola M, Libiger O, Alix A, McCosh RB, Chen H, Schork NJ, et al. 2013.** Patterns of population epigenomic diversity. *Nature* **495**: 193–198.

**Schulenburg H, Kurtz J, Moret Y, Siva-Jothy MT. 2009.** Introduction. Ecological immunology. *Philosophical Transactions of the Royal Society B: Biological Sciences* **364**: 3–14.

**Seppälä O. 2015.** Natural selection on quantitative immune defence traits: a comparison between theory and data. *Journal of Evolutionary Biology* **28**: 1–9.

**Sheldon BC, Verhulst S. 1996.** Ecological immunology: Costly parasite defences and trade-offs

in evolutionary ecology. *Trends in Ecology & Evolution* **11**: 317–321.

**Siddle KJ, Quintana-Murci L. 2014.** The Red Queen's long race: human adaptation to pathogen pressure. *Current Opinion in Genetics & Development* **29**: 31–38.

**Simon M, Loudet O, Durand S, Bérard A, Brunel D, Sennesal F-X, Durand-Tardif M, Pelletier G, Camilleri C. 2008.** Quantitative Trait Loci Mapping in Five New Large Recombinant Inbred Line Populations of *Arabidopsis thaliana* Genotyped With Consensus Single-Nucleotide Polymorphism Markers. *Genetics* **178**: 2253–2264.

**Stich B, Mohring J, Piepho H-P, Heckenberger M, Buckler ES, Melchinger AE. 2008.** Comparison of Mixed-Model Approaches for Association Mapping. *Genetics* **178**: 1745–1754.

**Tank DC, Olmstead RG. 2008.** From annuals to perennials: phylogeny of subtribe Castillejininae (Orobanchaceae). *American Journal of Botany* **95**: 608–625.

**Tellier A, Brown JKM. 2007.** Polymorphism in multilocus host parasite coevolutionary interactions. *Genetics* **177**: 1777–1790.

**Thines BC, Youn Y, Duarte MI, Harmon FG. 2014.** The time of day effects of warm temperature on flowering time involve PIF4 and PIF5. *Journal of Experimental Botany* **65**: 1141–1151.

**Tian D, Traw MB, Chen JQ, Kreitman M, Bergelson J. 2003.** Fitness costs of R-gene-mediated resistance in *Arabidopsis thaliana*. *Nature* **423**: 74–77.

**Toomajian C, Hu TT, Aranzana MJ, Lister C, Tang C, Zheng H, Zhao K, Calabrese P, Dean C, Nordborg M. 2006.** A Nonparametric Test Reveals Selection for Rapid Flowering in the *Arabidopsis* Genome. *PLoS Biology* **4**: e137.

**Trapnell C, Williams BA, Pertea G, Mortazavi A, Kwan G, van Baren MJ, Salzberg SL, Wold BJ, Pachter L. 2010.** Transcript assembly and quantification by RNA-Seq reveals unannotated transcripts and isoform switching during cell differentiation. *Nature Biotechnology* **28**: 516–520.

**van Boven M, Weissing FJ. 2004.** The evolutionary economics of immunity. *American Naturalist* **163**: 277–294.

**Van Valen L. 1973.** A new evolutionary law. *Evolutionary Theory* **1**: 1–30.

**Vetter MM, Kronholm I, He F, Haweker H, Reymond M, Bergelson J, Robatzek S, de Meaux J. 2012.** Flagellin Perception Varies Quantitatively in *Arabidopsis thaliana* and Its Relatives. *Molecular Biology and Evolution* **29**: 1655–1667.

**Vidigal DS, Marques ACSS, Willems LAJ, Buijs G, Méndez-Vigo B, Hilhorst HWM, Bentsink L, Picó FX, Alonso-Blanco C. 2016.** Altitudinal and climatic associations of seed dormancy and flowering traits evidence adaptation of annual life cycle timing in *Arabidopsis thaliana*. *Plant, Cell & Environment* **39**: 1737–1748.

**Whalen MC. 2005.** Host defence in a developmental context. *Molecular Plant Pathology* **6**: 347–360.

**Wilczek AM, Roe JL, Knapp MC, Cooper MD, Lopez-Gallego C, Martin LJ, Muir CD, Sim S, Walker A, Anderson J, et al. 2009.** Effects of genetic perturbation on seasonal life history

plasticity. *Science* **323**: 930–934.

**Wilson DC, Carella P, Isaacs M, Cameron RK. 2013.** The floral transition is not the developmental switch that confers competence for the *Arabidopsis* age-related resistance response to *Pseudomonas syringae* pv. tomato. *Plant Molecular Biology* **83**: 235–246.

**Yekutieli D, Benjamini Y. 1999.** Resampling-based false discovery rate controlling multiple test procedures for correlated test statistics. *Journal of Statistical Planning and Inference* **82**: 171–196.

**Yu J, Pressoir G, Briggs WH, Vroh Bi I, Yamasaki M, Doebley JF, McMullen MD, Gaut BS, Nielsen DM, Holland JB, et al. 2006.** A unified mixed-model method for association mapping that accounts for multiple levels of relatedness. **38**: 203–208.



**Figure 1:** Model of coevolution between defense and the timing of flowering ( $f_t$ ) which marks the end of the vegetative life span in annual plants.  $f_t$  influences survival via its impact on the risk of infection, as well as plant size, which is a function of the length of vegetative life span. Optimal defense thus maximizes survival as a function of  $f_t$ . Size at flowering determines the amount of resources available for seed production and thus fitness ( $W$ ). Parameters of the model are listed in the inset.

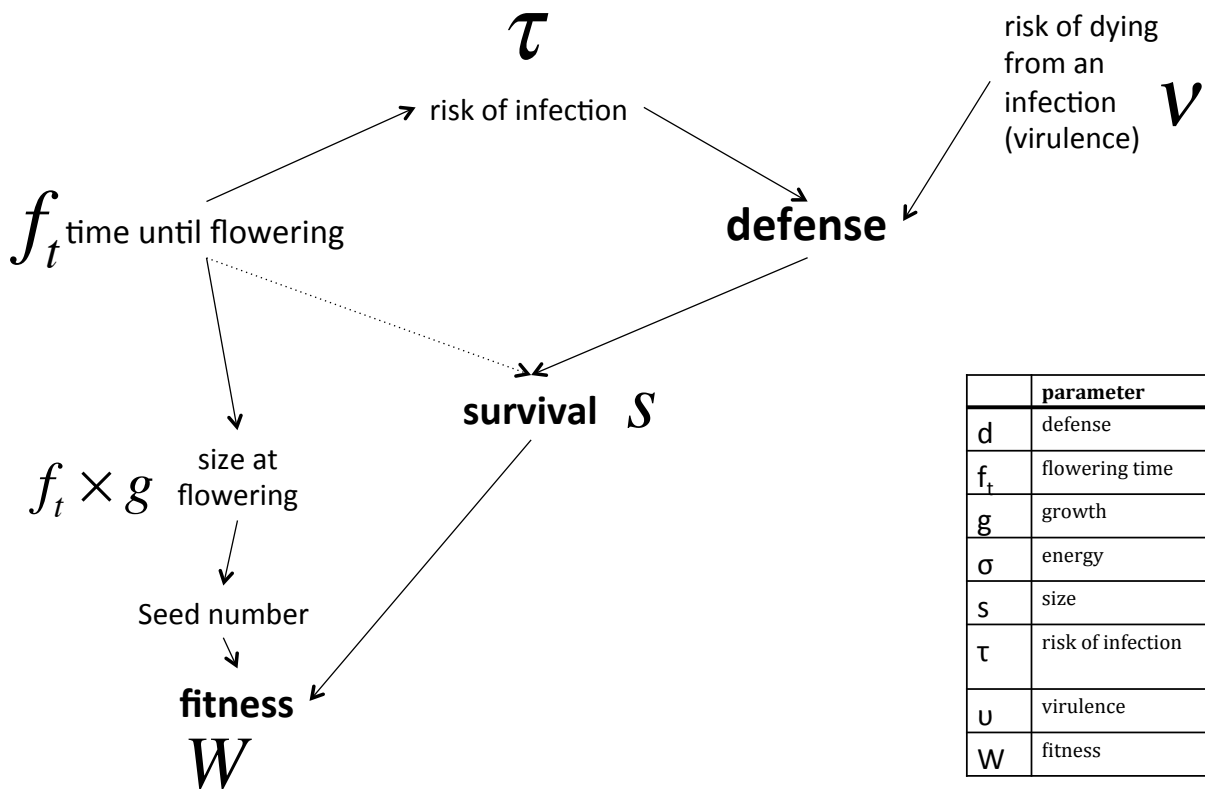

**Figure 2:** Distribution of Spearman correlation coefficients between expression levels of each expressed *A. thaliana* gene and flowering time. Grey: All expressed genes; Blue: Genes annotated as flowering time genes (FT genes); Red: Genes annotated as defense genes; Pink: Flagellin-responsive (FlaRe) genes (Navarro et al. 2004). **A.** For 138 Swedish genotypes; **B.** Analysis restricted to 51 Swedish genotypes showing correlated flowering time at 10°C and 16°C; **C.** Species-wide sample of 52 genotypes. Distribution for each group of genes was compared to the genome-wide distribution (black double-headed arrow) with a Kolmogorov-Smirnov test. P-values are given in the color corresponding to the gene class. Spearman correlation coefficients were computed between expression levels of each of 23,511 expressed *A. thaliana* genes, reported in Durbin et al. 2015 for 9th leaf seedlings, and flowering time measured in the same condition for 51 genotypes originating from natural populations in Sweden (Sasaki et al. 2015). \*\*\*  $p < 0.001$ .

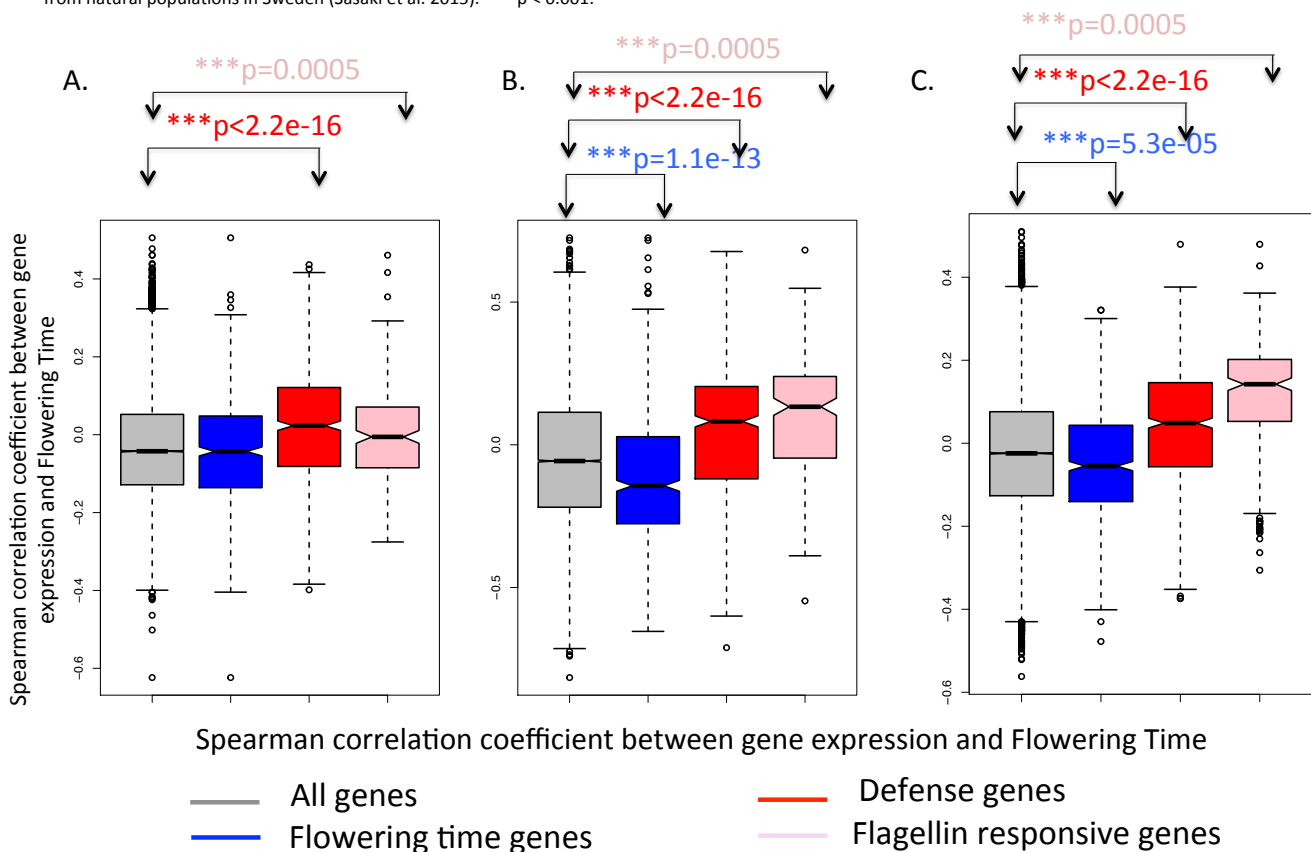

**Figure 3:** Distribution of Spearman correlation coefficients between gene expression level and flowering time. **A.** Partition of genes controlled by flowering time (blue border) vs independent from flowering time (black border); **B.** Partition of genes controlled by development (orange border) vs independent from development (black border). Defense genes that are not controlled by flowering time but controlled by development tend to have higher correlation coefficients between expression and flowering time. Grey: All expressed genes; Blue: Genes annotated as flowering time genes (FT genes); Red: Genes annotated as defense genes; Pink: Flagellin-responsive (FlaRe) genes (Navarro et al. 2004). P-values for Kolmogorov-Smirnov test comparing the distribution of genes within each category that are independent of or regulated by **A.** flowering time or **B.** age are shown when significant. Note that only 12 FlaRe genes are controlled by flowering time in our experiment. Spearman correlation coefficients were computed between expression levels of each of 23,511 expressed *A. thaliana* genes, reported in Durbin et al. 2015 for 9th leaf seedlings, and flowering time measured in the same condition for 51 genotypes originating from natural populations in Sweden (Sasaki et al. 2015). \*  $p < 0.05$ , \*\*\*  $p < 0.001$ .

**A- FT-dependent regulation**

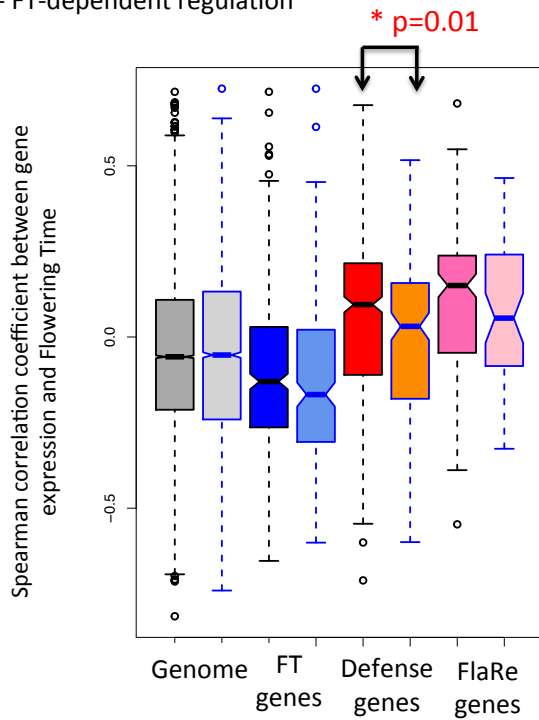

**B- Age-dependent regulation**

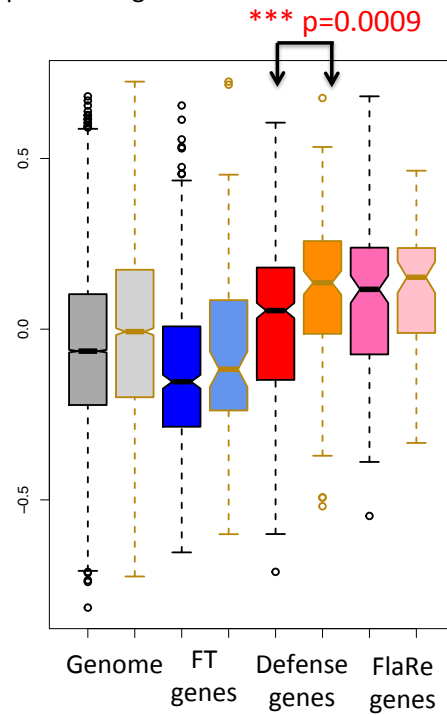

**Figure 4:** Distribution of Spearman correlation coefficients between gene expression level and flowering time. All expressed genes (black border) vs genes with fitness-associated SNPs in (Fournier-Level et al. 2011 (purple border)). Grey: All expressed genes; Blue: Genes annotated as flowering time genes (FT genes); Red: Genes annotated as defense genes. Flowering time and gene expression measures were correlated for 16°C. The expression of defense genes that contain fitness-associated SNPs tend to have higher correlation coefficients with flowering time. P-values for Kolmogorov-Smirnov test comparing the distribution for genes within each category are shown when significant. Spearman correlation coefficients were computed between expression levels of each of 23,511 expressed *A. thaliana* genes, reported in Durbin et al. 2015 for 9th leaf seedlings, and flowering time measured in the same condition for 51 genotypes originating from natural populations in Sweden (Sasaki et al. 2015). \*  $p < 0.05$ .

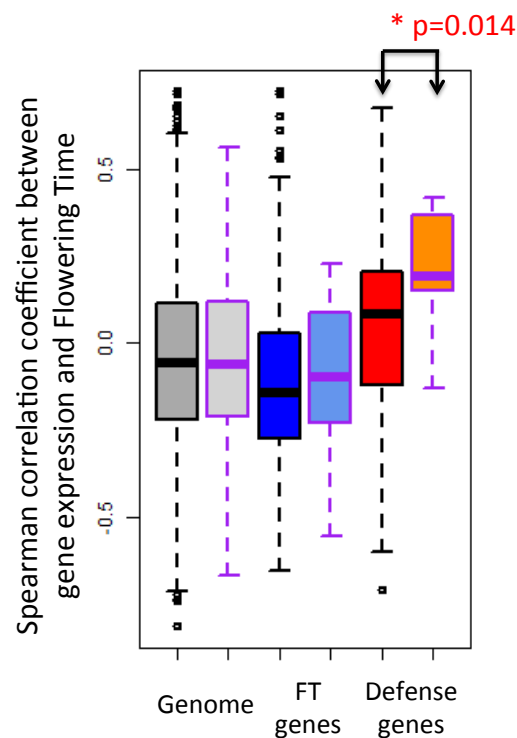

**Suppl. Figure 1:** Distribution of estimated effect of flowering time as explanatory factor of gene expression variation, taking into account population structure between Swedish genotypes of group A. The trend shown in Figure 1 is maintained after controlling for population structure. P-values for Kolmogorov-Smirnov test comparing estimate distribution for the gene subset compared to the genome-wide distribution are given. **A.** Density distribution, **B.** Boxplots. What is group A?

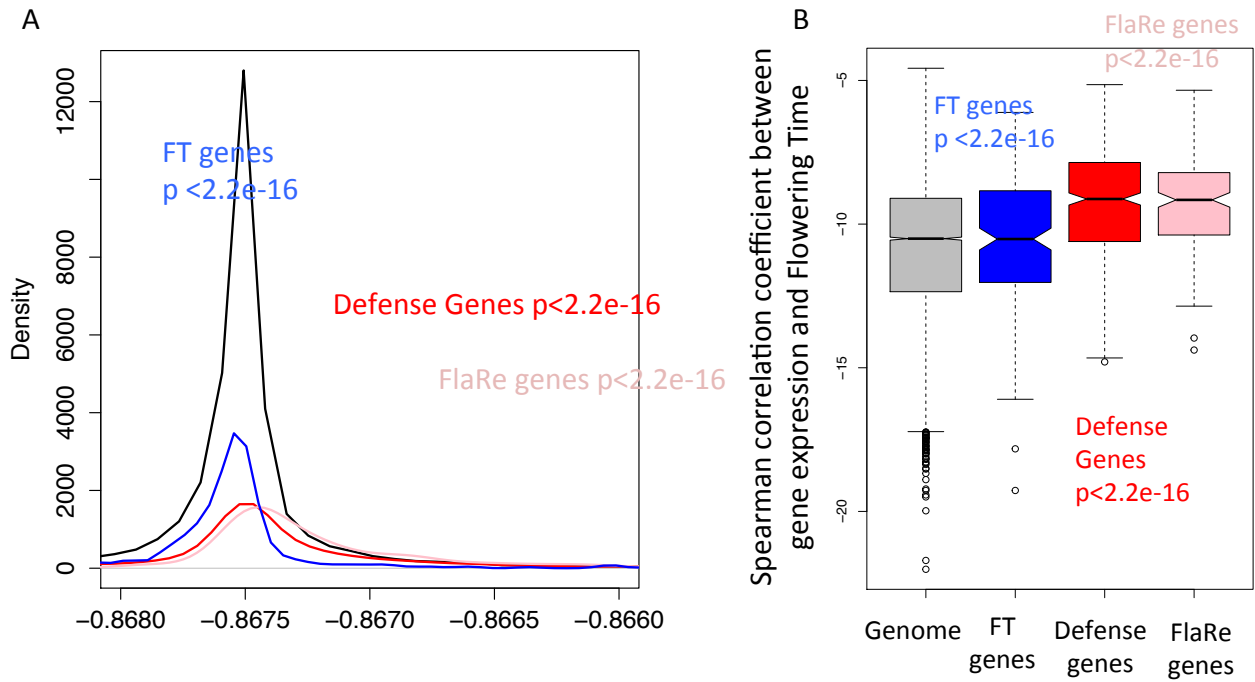

**Suppl. Figure 2:** Distribution of correlation coefficients between gene expression and flowering time restricted to the genes showing differential expression in Col-0 vs. Bur-0. Expression differences between the genotypes Col-0 and Bur-0 recapitulate the pattern reported within natural populations in Figure 1. Distribution of Spearman correlation coefficients between gene expression level and flowering time for a set of genotypes showing consistent differences in flowering at 10°C and 16°C (Group A genotypes, Sasaki et al. 2015). This analysis is restricted to the 6980 genes showing differential expression between Col-0 and Bur-0. Defense genes have a stronger skew in correlation coefficients with flowering time. Spearman correlation coefficients were computed between expression level of each of 6980 expressed *A. thaliana* genes, reported in Durbin et al. 2015 for 9th leaf seedlings, and flowering time measured in the same condition. Genotypes originate from natural populations in Sweden (Sasaki et al. 2015). Black line: All expressed genes, Blue lines: Gene annotated as flowering time genes (FT genes), Red lines: Genes annotated as defense genes, Pink line: Flagellin-responsive (FlaRe) genes (Navarro et al. 2004).

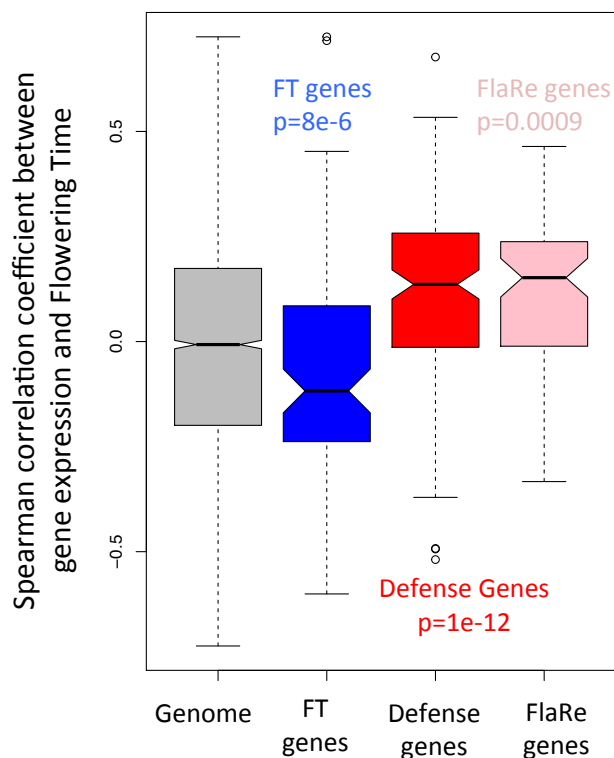

**Suppl. Figure 3:** Bulk-sequencing strategy used to identify FT-controlled genes, i.e. genes whose expression is genetically controlled by flowering time regulators or by genes located closely to and therefore co-segregating with flowering time regulators.

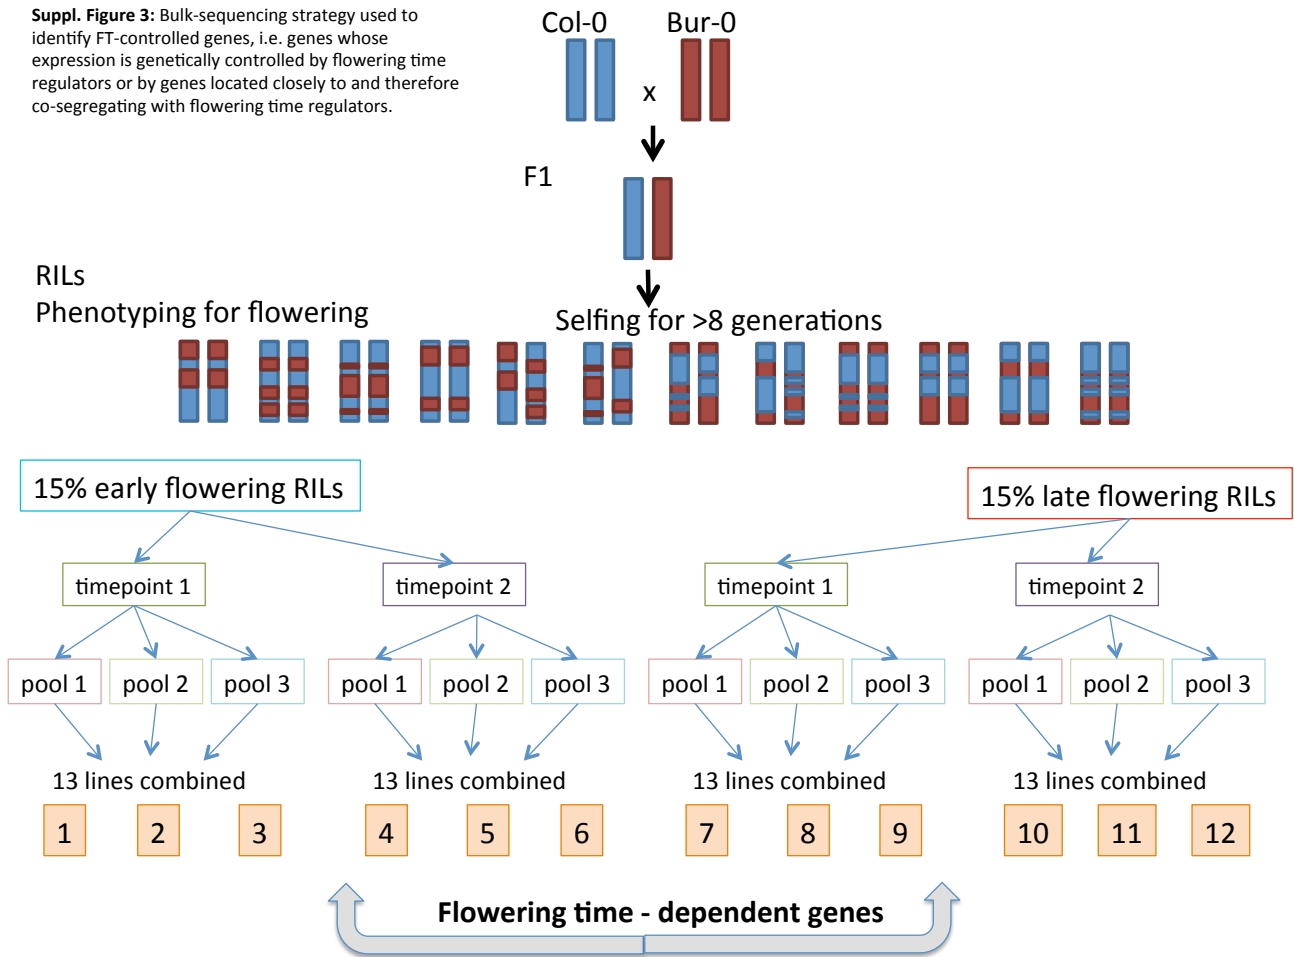

**Suppl. Figure 4:** Heatmap of gene expression variation between samples for the 1000 genes showing highest expression variation between samples. Clustering of gene expression levels across sample and replicate shows that samples partition primarily by age, and flowering time, with the exception of Col-0 at 28 days.

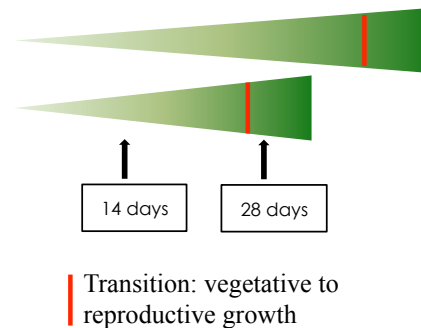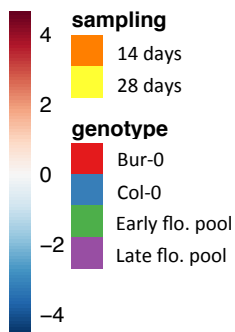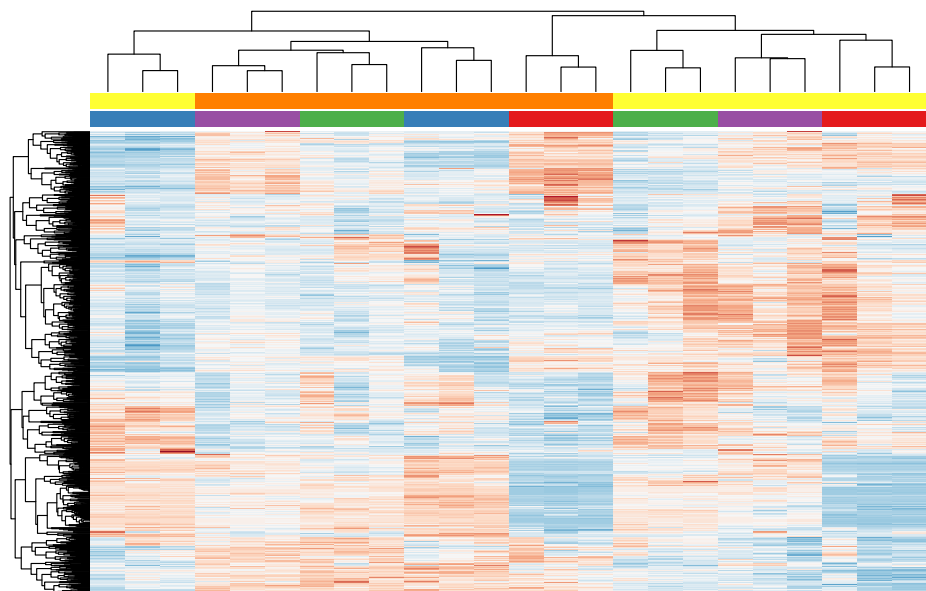

Source: https://www.biorxiv.org/content/10.1101/131136v2.full.pdf
